# Supplementary material for: Ganoderma tsugae Extract Inhibits Growth of HER2-Overexpressing Cancer Cells via Modulation of HER2/PI3K/Akt Signaling Pathway
Source: PubMed Central journal article supplement (PMC3638576; doi:10.1155/2013/219472), 2013-04-07
Supplement: 219472.f1.pdf [file 219472.f1.pdf]

# Supplementary Fig. S1

## A

|     | GT1 | GT2    | GT3    |
|-----|-----|--------|--------|
| GT1 | 1   | 0.9722 | 0.9558 |
| GT2 | -   | 1      | 0.9593 |
| GT3 | -   | -      | 1      |

## B

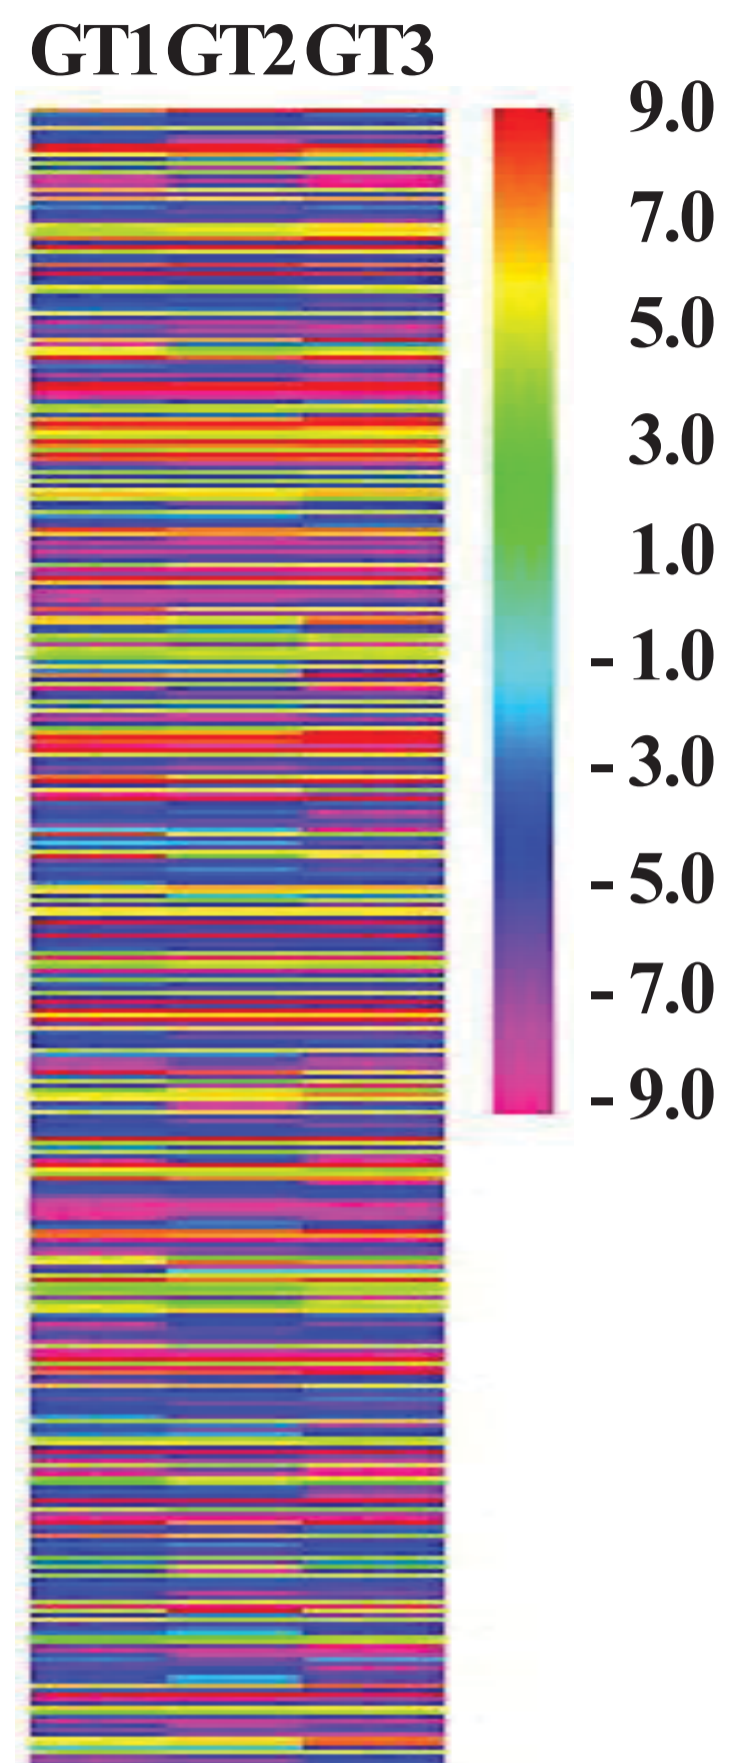

**Supplementary Fig. S1:** Quality control of *Ganoderma tsugae* extracts (GTEs). (A) Phytomics Similarity Index (PSI) (judged by PhytoViewerBR2.2, PhytoCeutica, Inc.). (B) The bioresponse fingerprint (BF) of GTEs. BF expressed as a color graph.

# Supplementary Fig. S2

## A

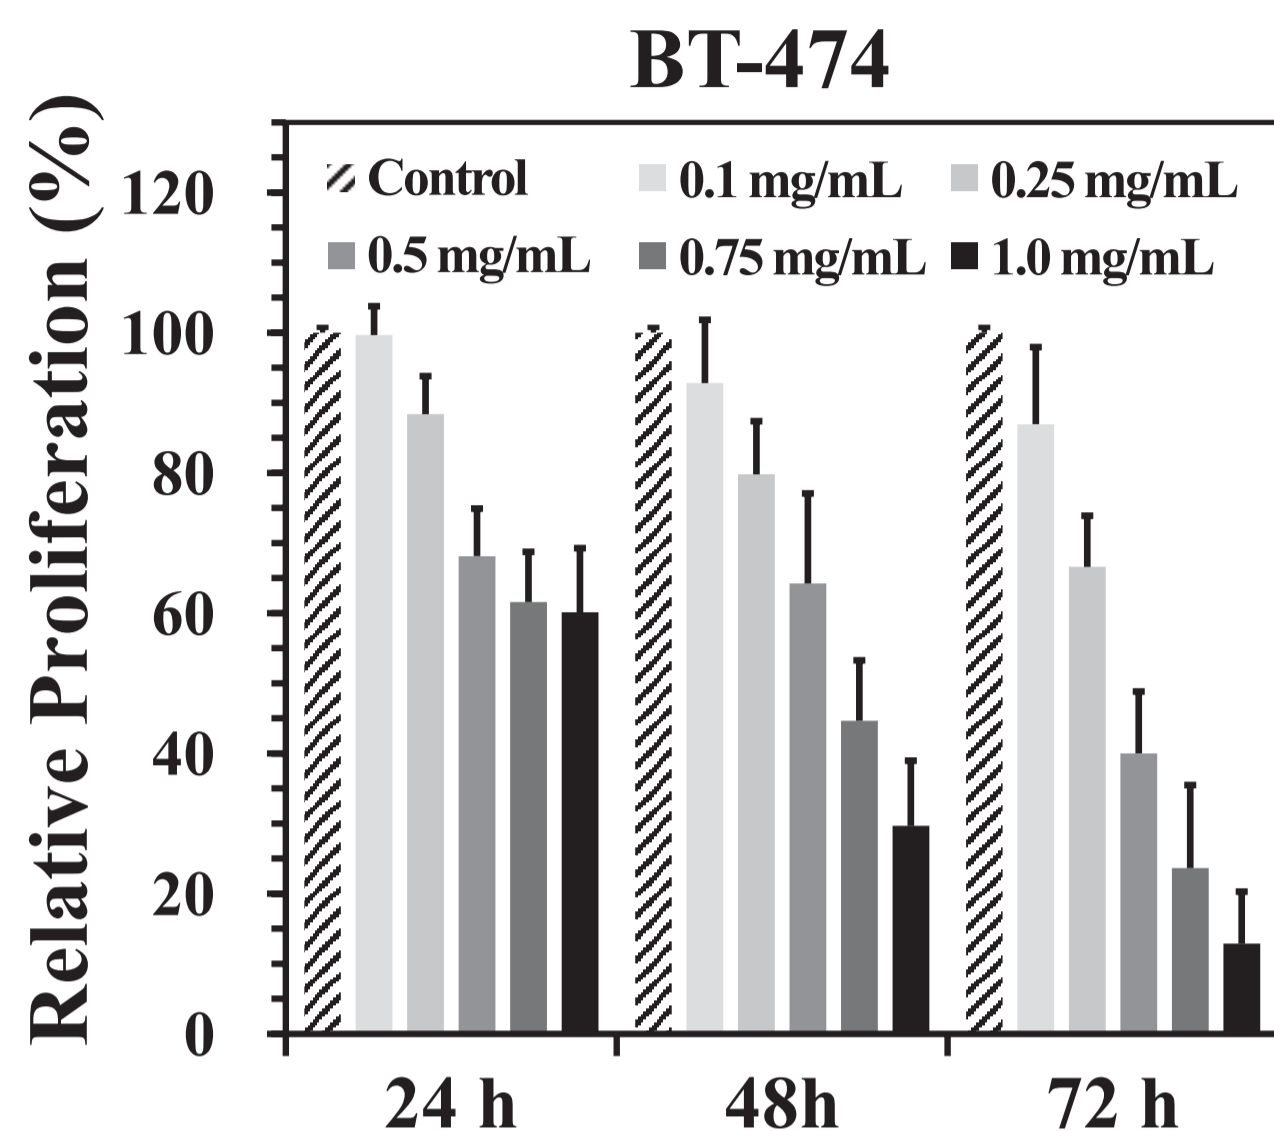

## B

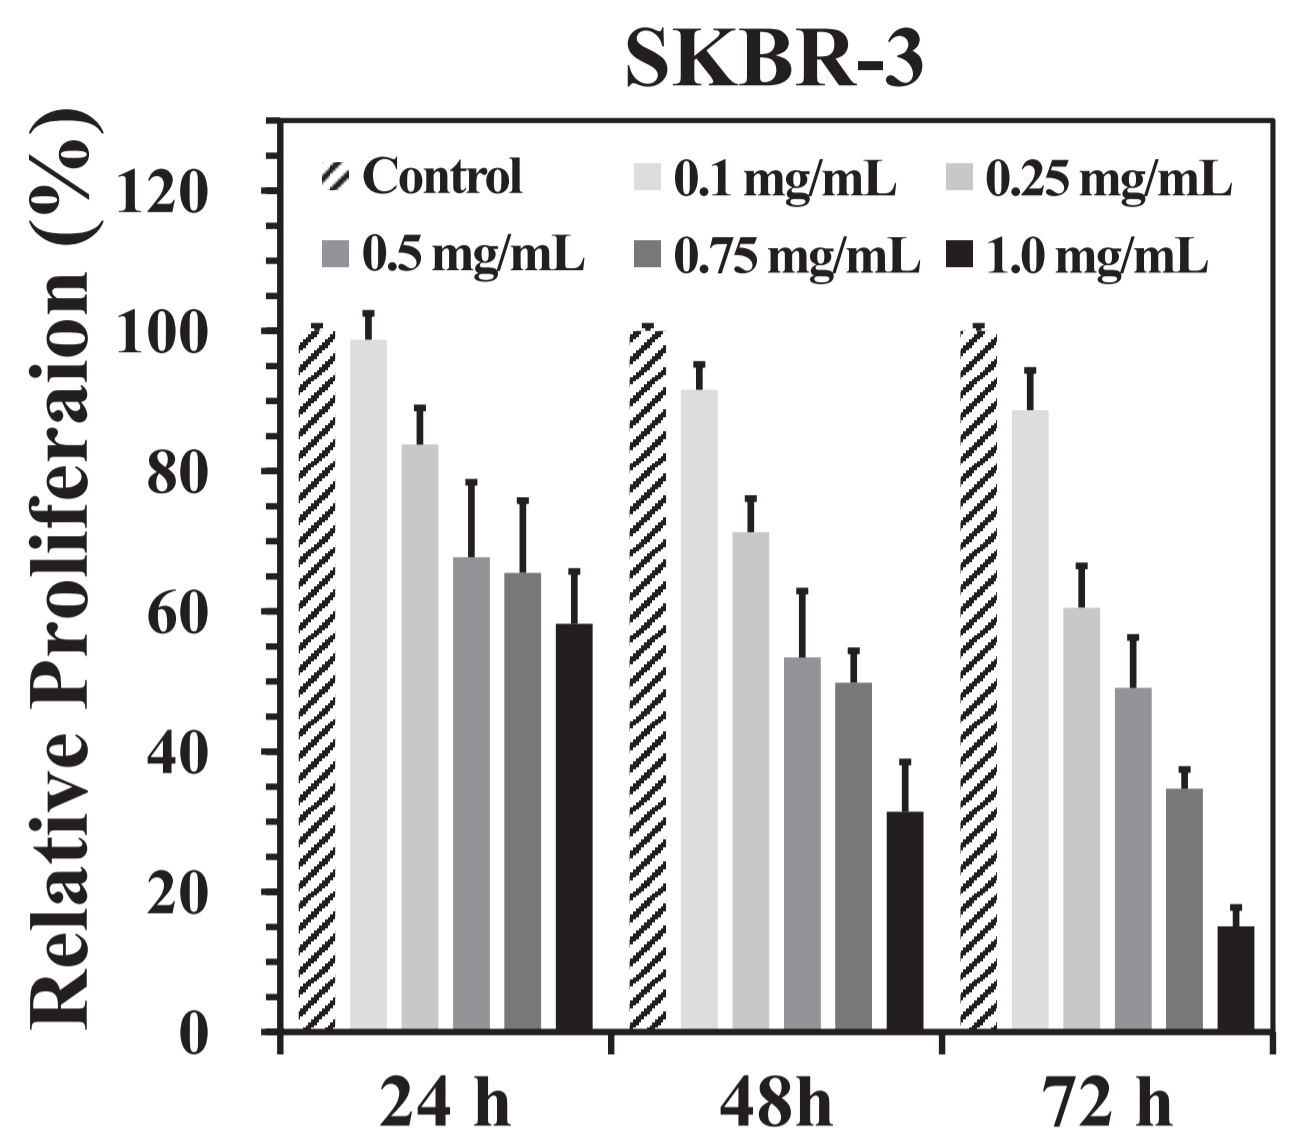

**Supplementary Fig. S2:** Effect of GTE on cell proliferation of HER2-overexpressing cancer cells. BT-474 (A) and SKBR-3 (B) cells were treated with various concentration of GTE (0.1, 0.25, 0.5, 0.75, and 1 mg/mL) for 72 h. Cell proliferation was determined using the MTT assay.

# Supplementary Fig. S3

## A

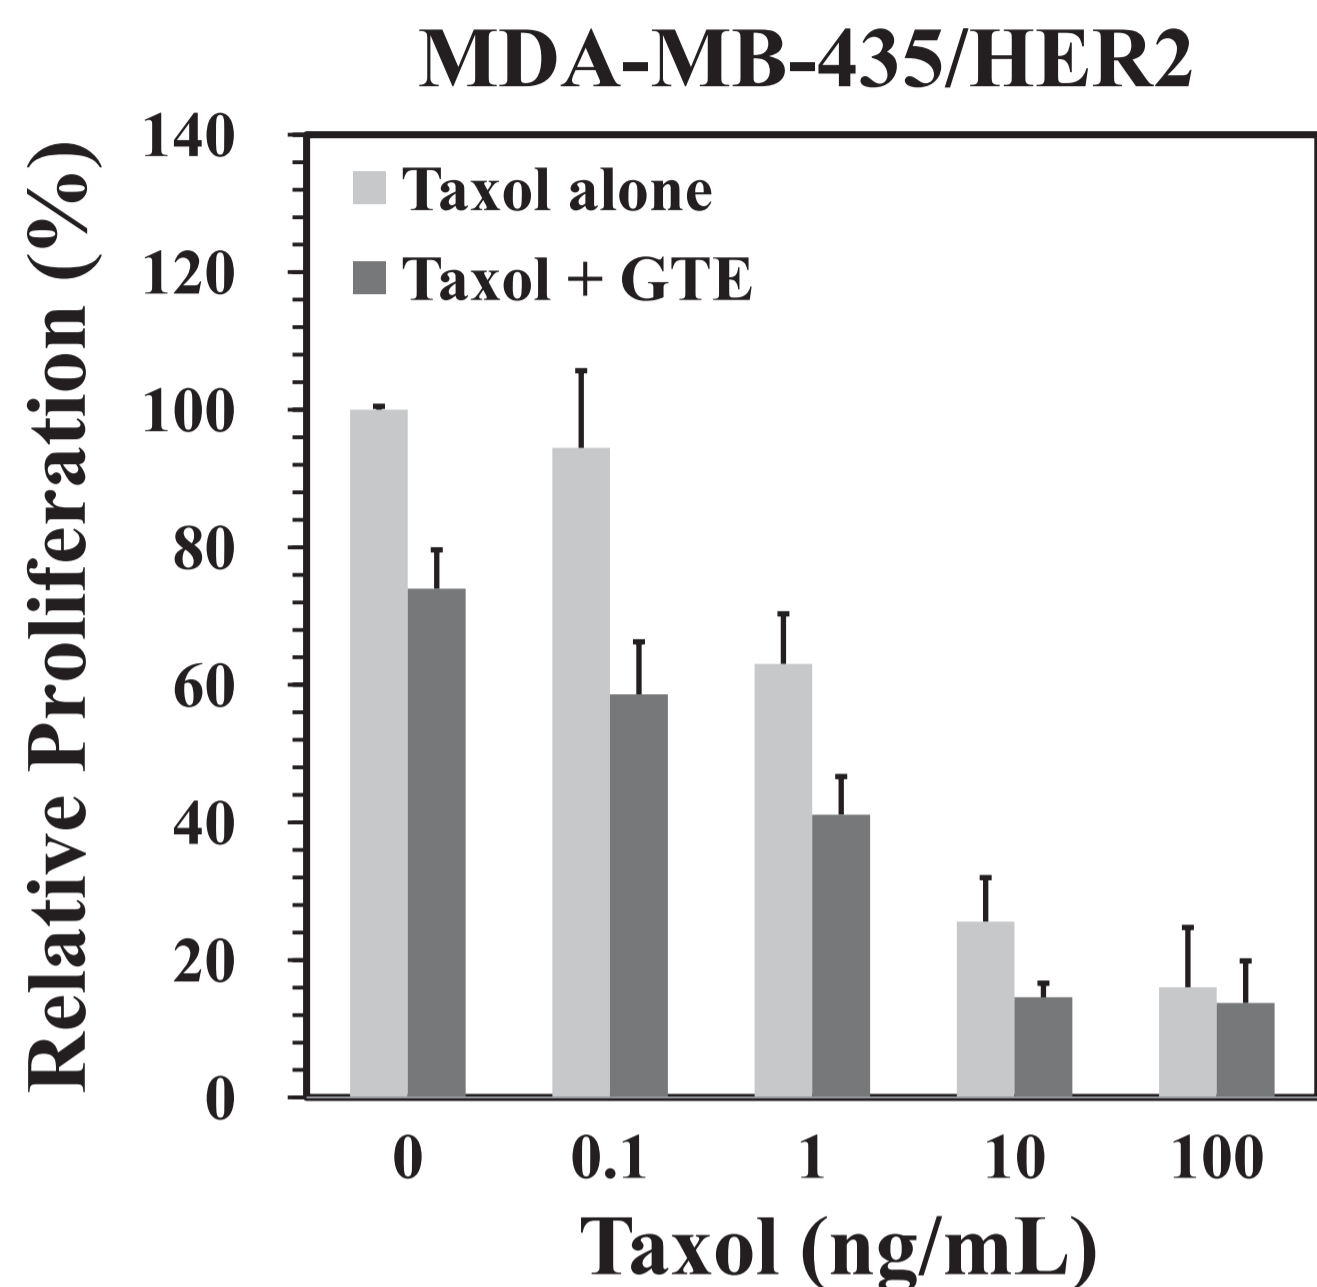

## B

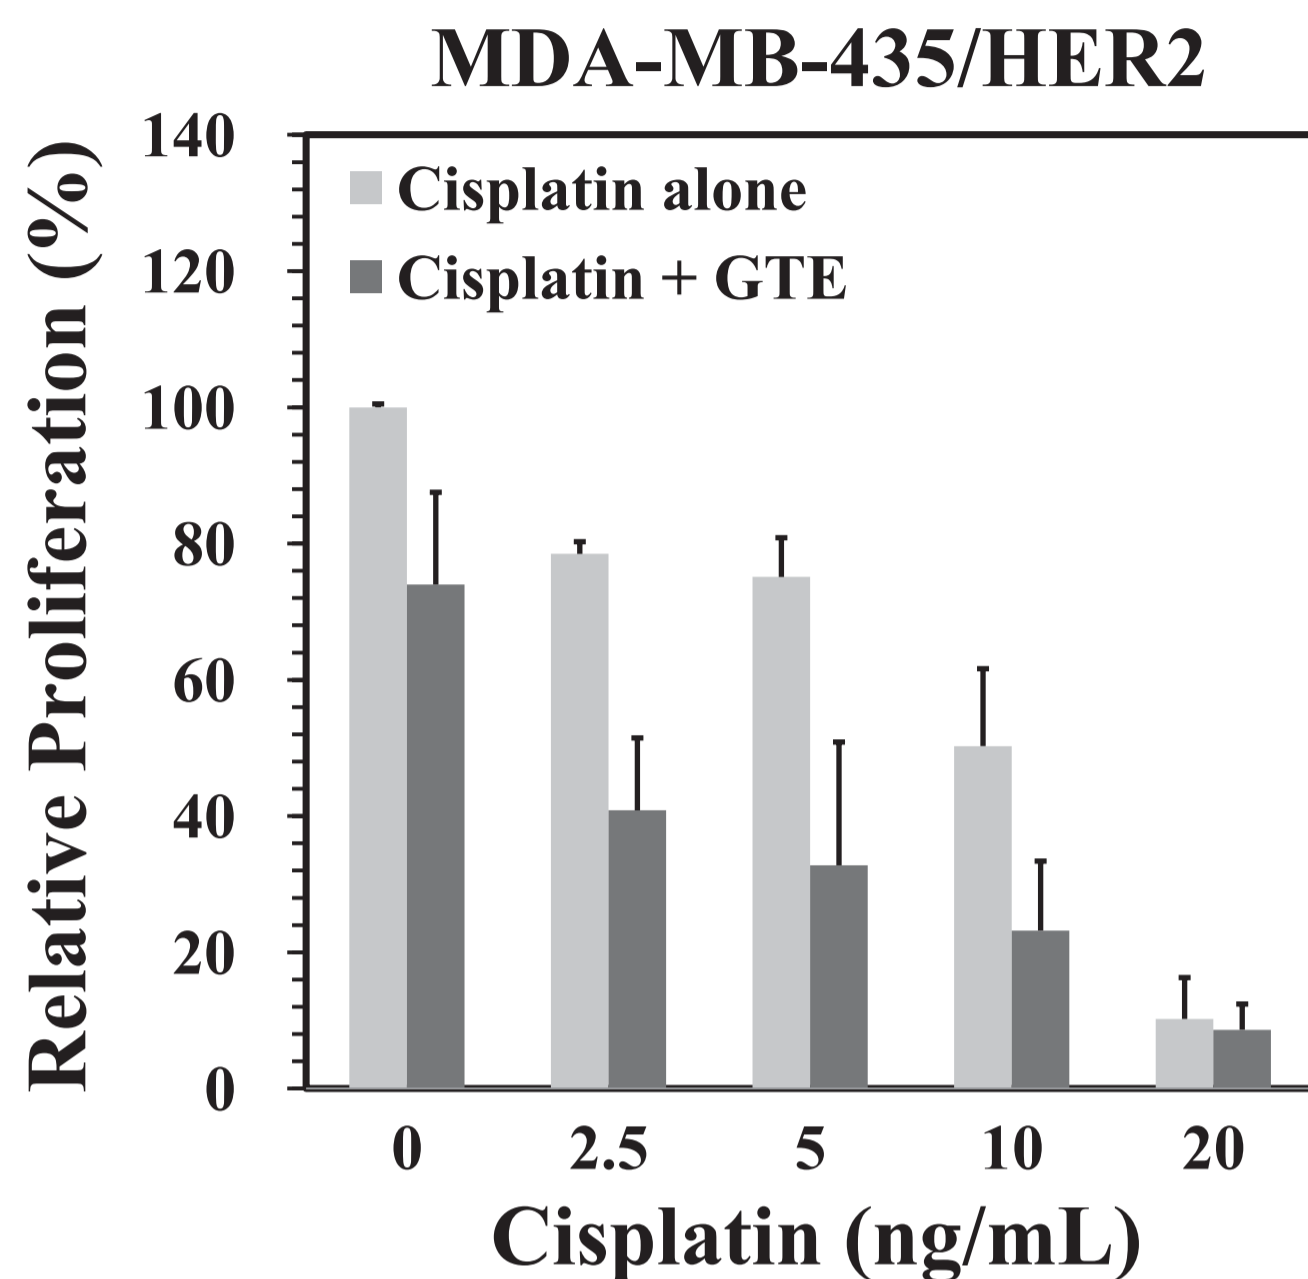

**Supplementary Fig. S3:** GTE sensitizes the anticancer effects taxol and cisplatin on HER2-overexpressing cancer cells. MDA-MB-435/HER2 cells were treated with various concentration of taxol (A) or cisplatin (B) with or without GTE (0.25 mg/mL) for 72 h. Cell proliferation was determined by MTT assay.

# Supplementary Fig. S4

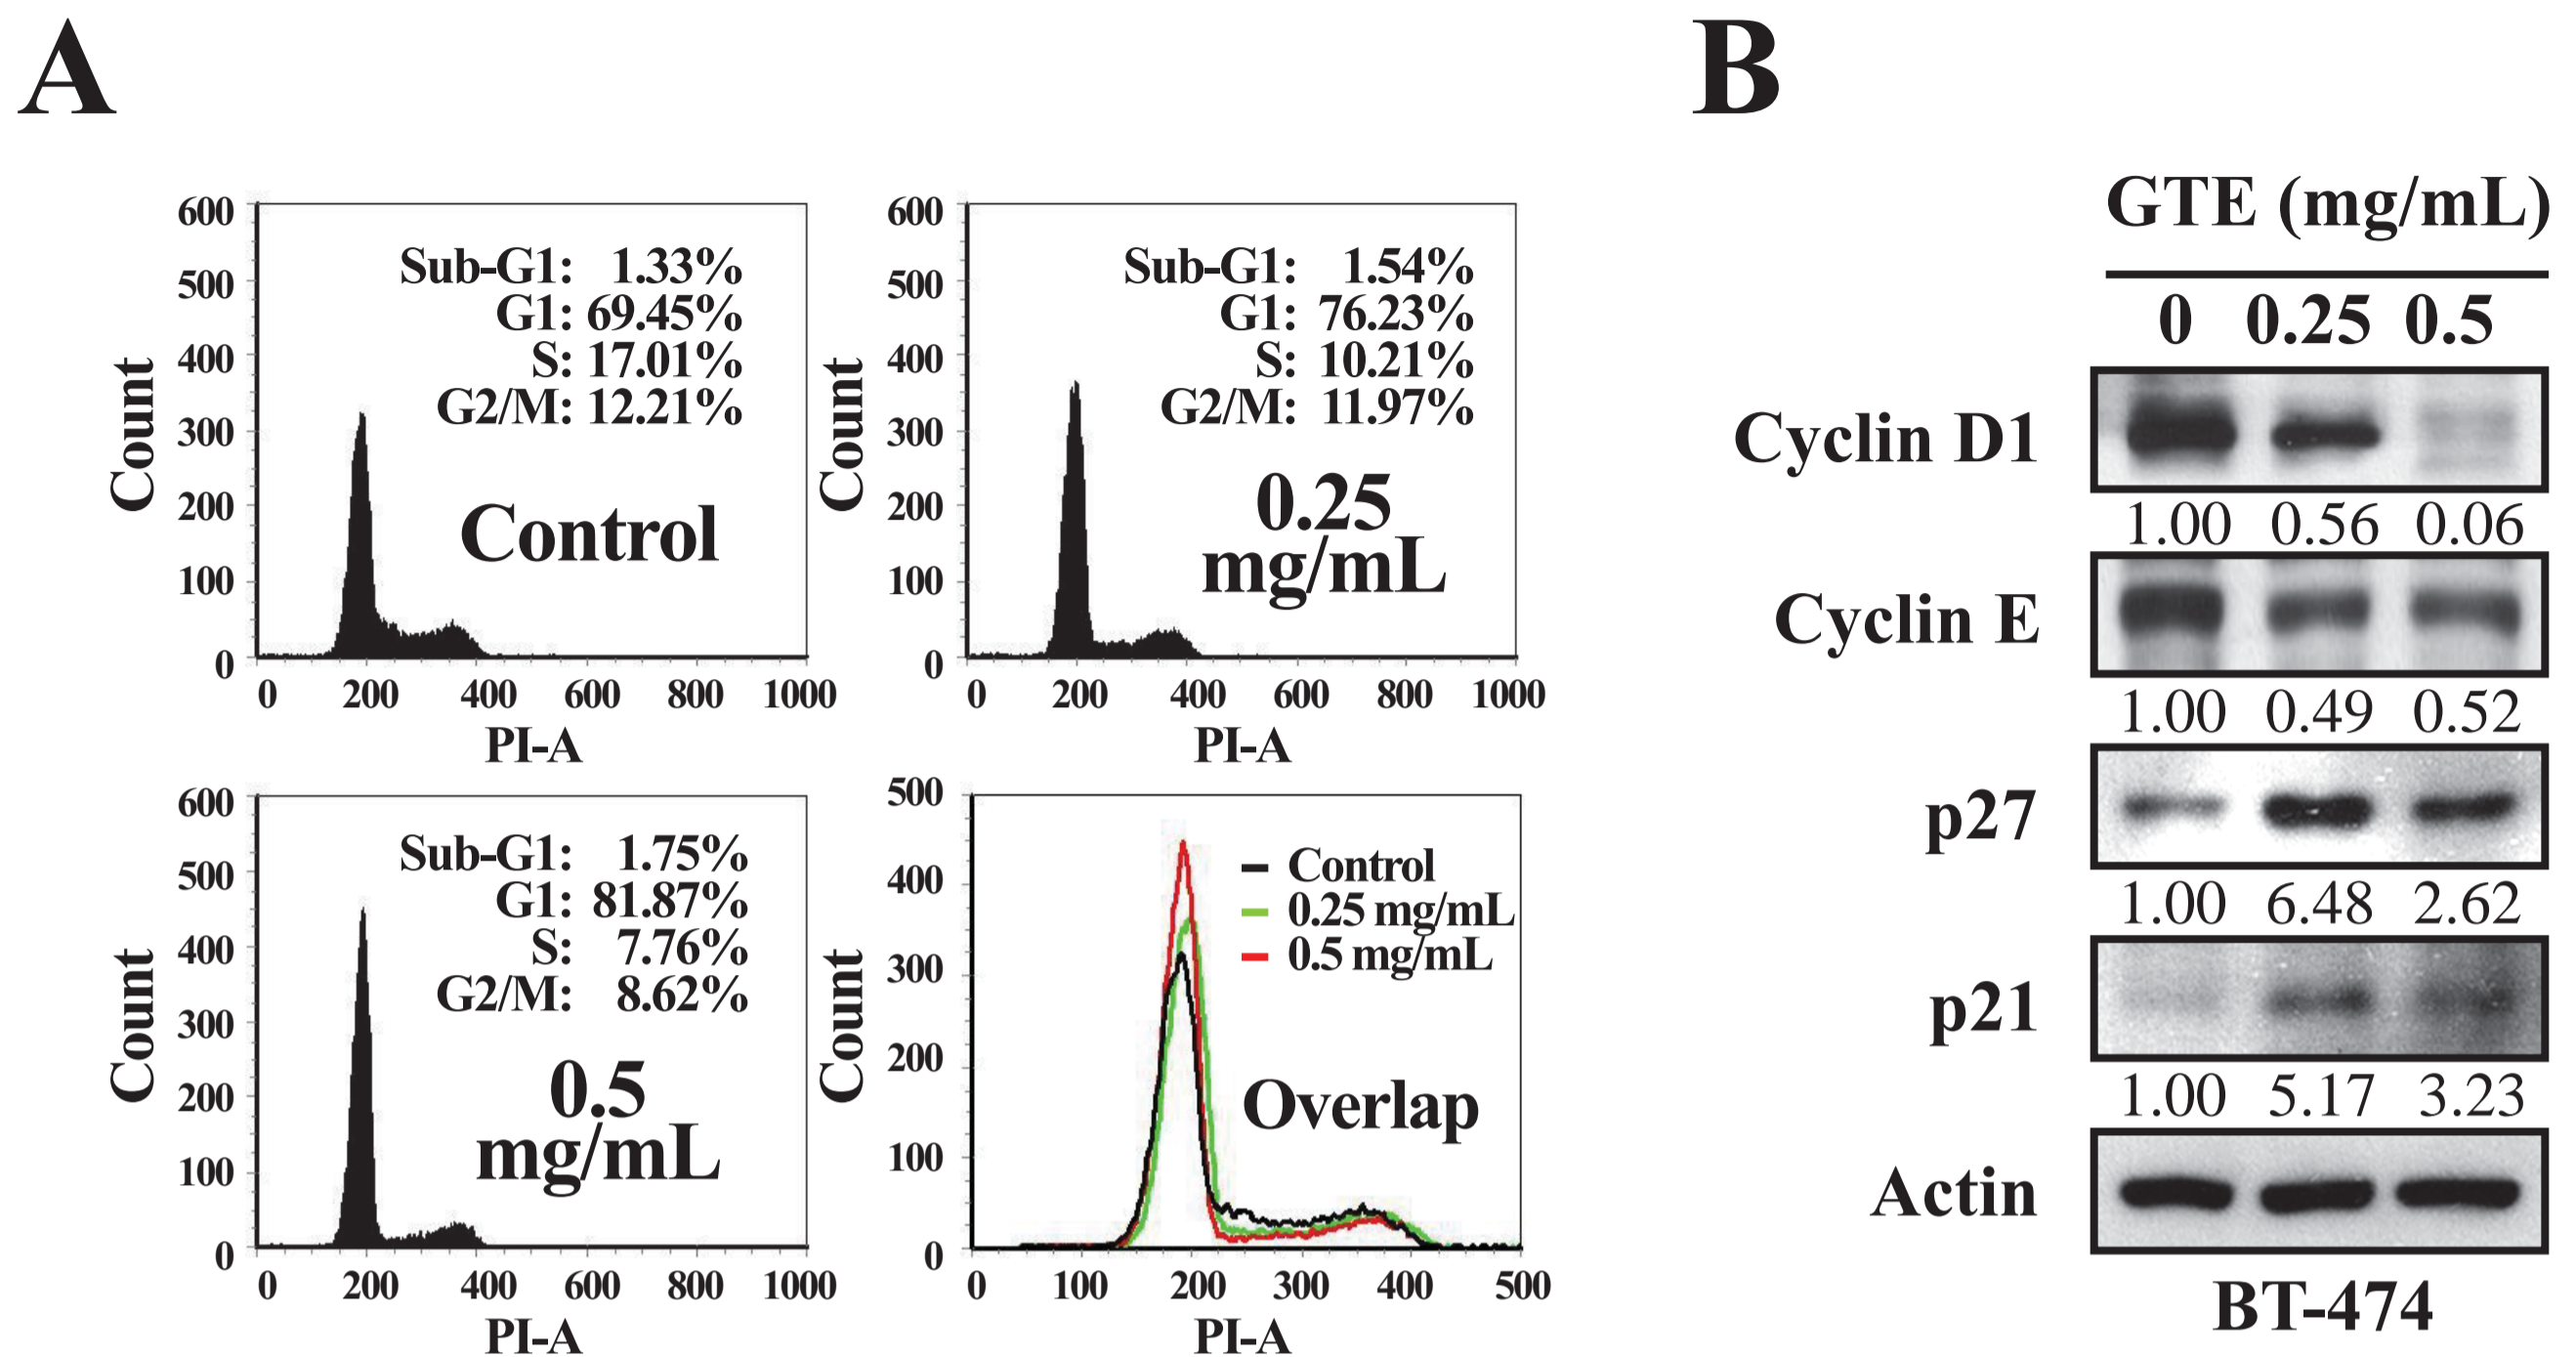

**Supplementary Fig. S4:** Effect of GTE on cell cycle of HER2-overexpressing cancer cells. BT-474 cells were treated with GTE (0.25 or 0.5 mg/mL) for 24 h. Distribution of cell cycle phases (A) and expression of cell cycle regulators (B) were analyzed by flow cytometry and Western blotting, respectively.

# Supplementary Fig. S5

## A

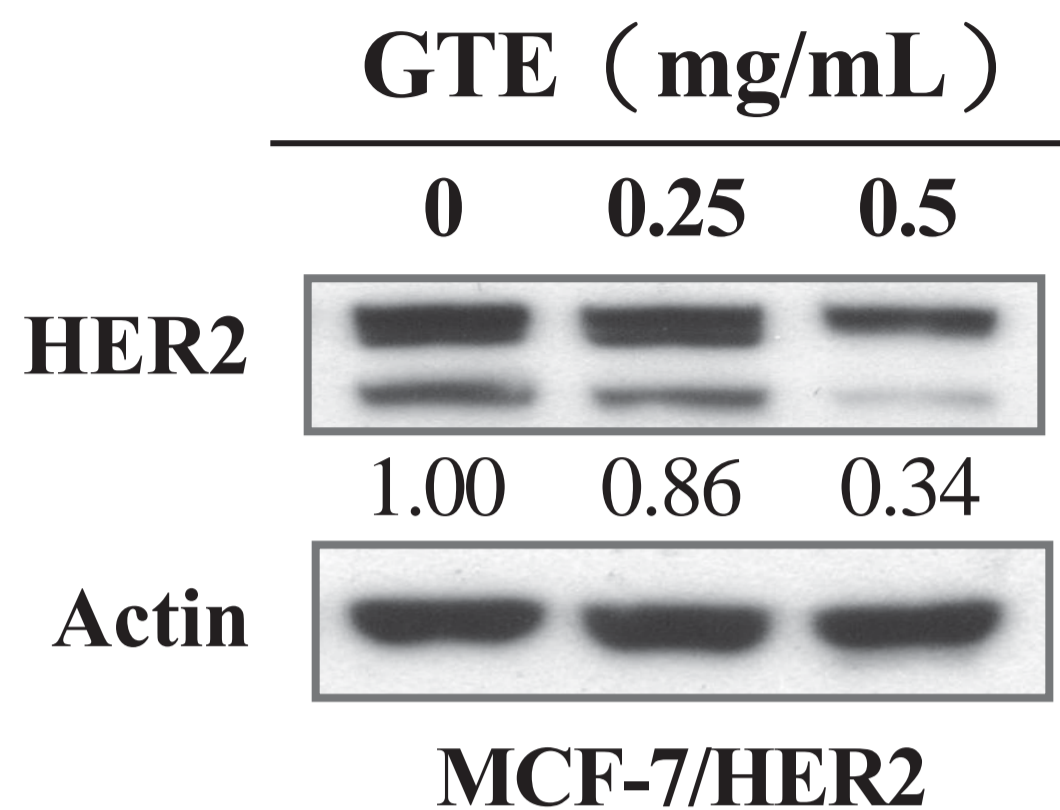

## B

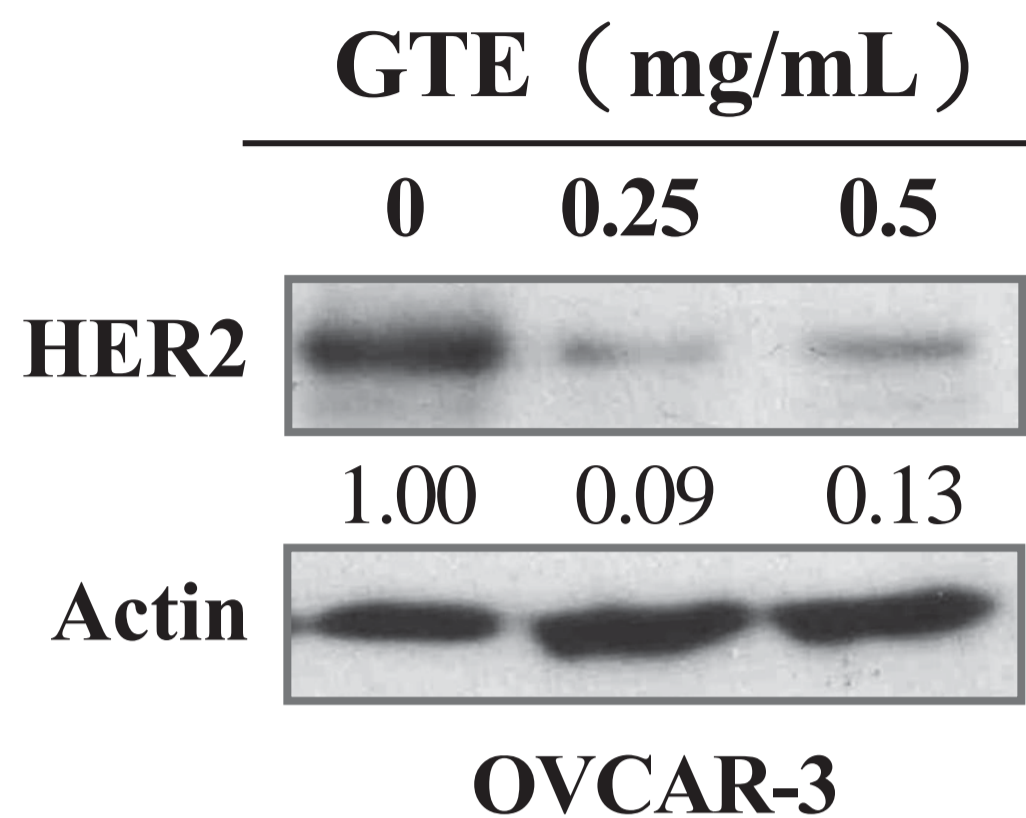

**Supplementary Fig. S5:** Effect of GTE on the expression of HER2 protein. MCF-7/HER2 (HER2<sup>high</sup>) (A) and OVCAR-3 (HER2<sup>low</sup>) (B) cells were treated with GTE (0.25 or 0.5 mg/mL) for 24 h. The protein expression of HER2 was measured by Western blotting.

# Supplementary Fig. S6

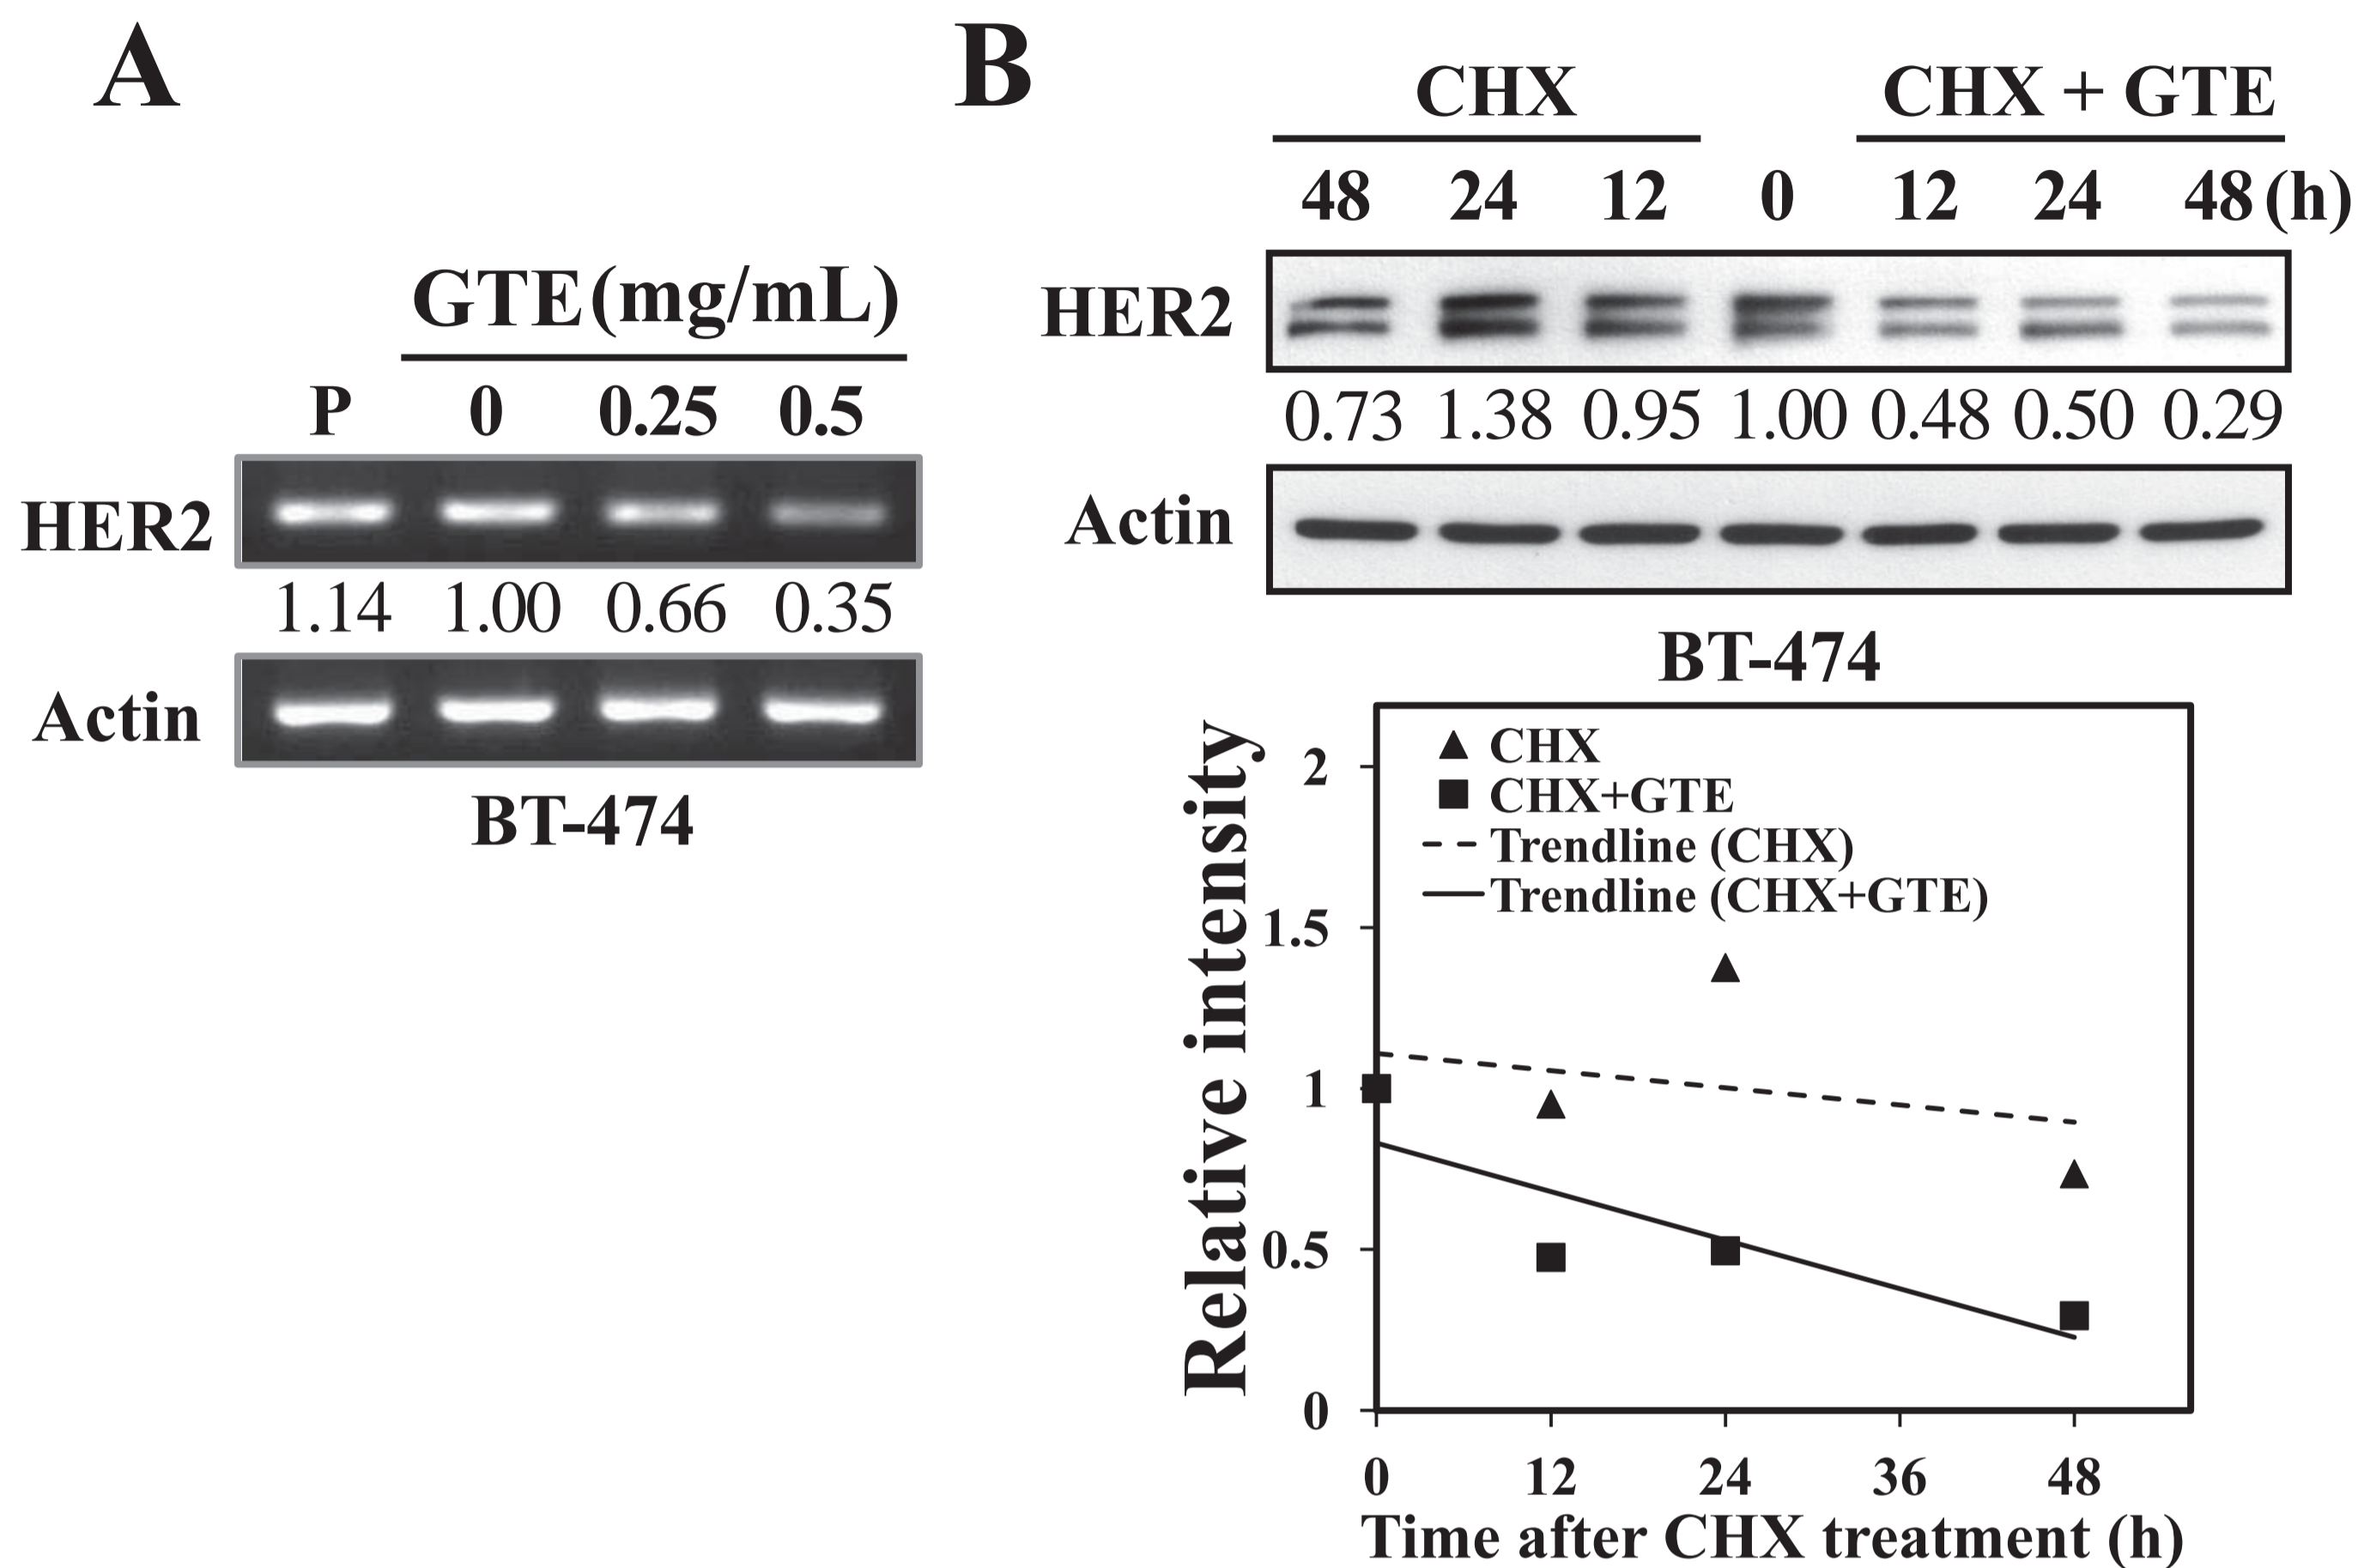

**Supplementary Fig. S6:** Effect of GTE on the expression of HER2 mRNA and the stability of HER2 protein in BT-474 cells. (A) Cells were treated with or without GTE (0.25 or 0.5 mg/mL) for 24 h. The mRNA level of HER2 was measured by semiquantitative RT-PCR. (B) Cells were pretreated with 20  $\mu$ g/mL of cycloheximide (CHX) for 30 min and then treated with or without GTE (0.5 mg/mL) for 12, 24, and 48 h. HER2 stability was determined by measuring the protein's half-life. P, parental cells.
